# Supplementary material for: Multifunctional magnetic nanoparticles for simultaneous cancer near-infrared imaging and targeting photodynamic therapy
Source: Royal Society of Chemistry journal article supplement (doi:10.1039/c4ra10801a), 2014-01-01
Supplement: c4ra10801a1.pdf [file c4ra10801a1.pdf]

## Supporting Information

### **The multifunctional magnetic nanoparticles for simultaneous cancer near-infrared imaging and targeting photodynamic therapy**

Xueling Zhao<sup>‡a</sup>, Zongyan Chen<sup>‡a</sup>, Hongli Zhao<sup>\*a</sup>, Denghao Zhang<sup>a</sup>, Liang Tao<sup>a</sup>,  
Minbo Lan<sup>\*a,b</sup>

<sup>a</sup> Shanghai Key Laboratory of Functional Materials Chemistry, and Research Centre of Analysis and Test, East China University of Science and Technology, Shanghai 200237, P. R. China

<sup>b</sup> State Key Laboratory of Bioreactor Engineering, East China University of Science and Technology, Shanghai 200237, P. R. China

\* Corresponding authors. E-mail: honglizhao@ecust.edu.cn; (Dr. Hongli Zhao) minbolan@ecust.edu.cn; (Prof. Dr. Minbo Lan) Tel: +86-21-64253574; Fax: +86-21-64252947

‡ These authors contributed equally to this work.

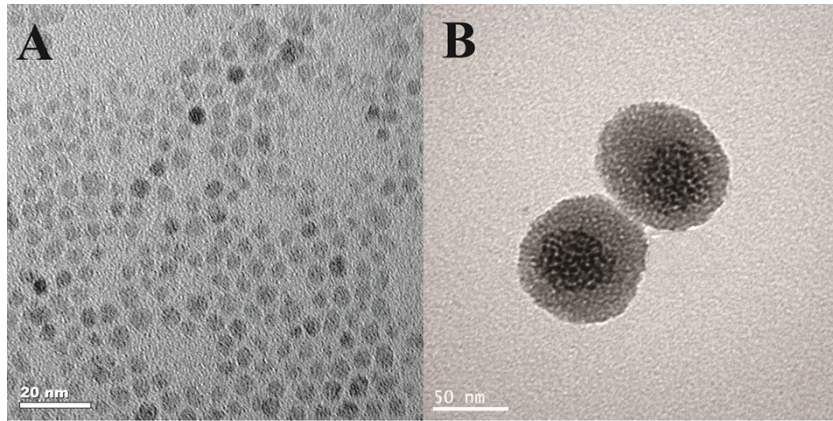

Fig. S1 TEM images of  $\text{Fe}_3\text{O}_4$  (A) and  $\text{Fe}_3\text{O}_4@\text{mSiO}_2(\text{MB})\text{-FA}$  (B) nanoparticles.

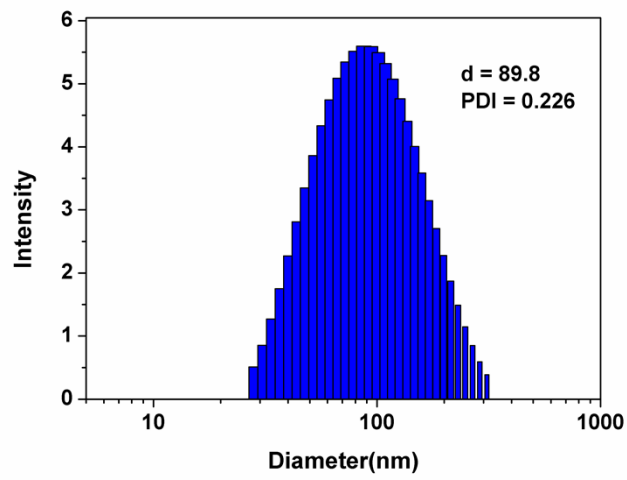

Fig. S2 Particle size distributions of Fe<sub>3</sub>O<sub>4</sub>@mSiO<sub>2</sub>(MB)-FA nanoparticles.

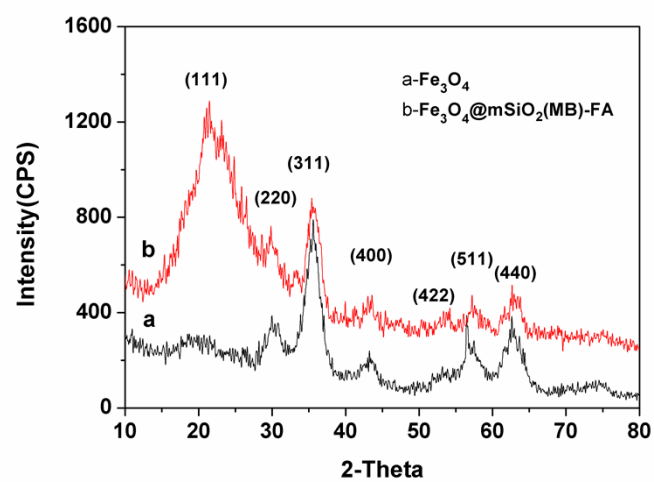

Fig. S3 XRD patterns of  $\text{Fe}_3\text{O}_4$  (a) and  $\text{Fe}_3\text{O}_4@m\text{SiO}_2(\text{MB})\text{-FA}$  (b)

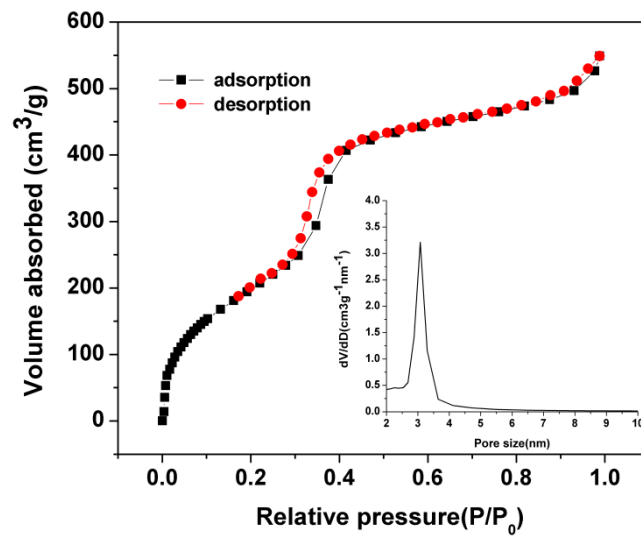

Fig. S4 The N<sub>2</sub> adsorption/desorption isotherm and pore size distribution curve (inset) of Fe<sub>3</sub>O<sub>4</sub>@mSiO<sub>2</sub>-FA

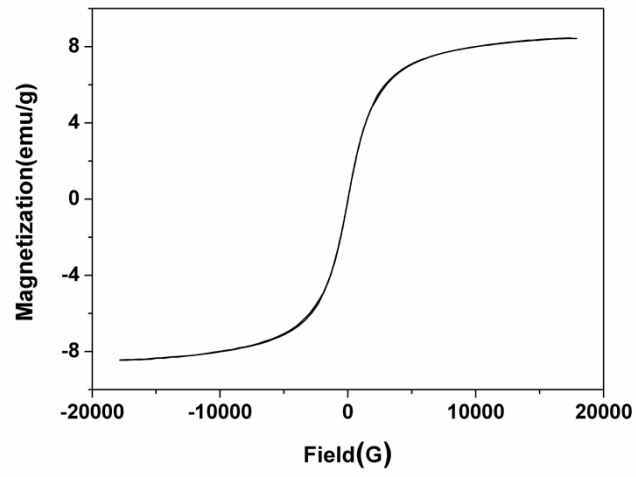

Fig. S5 Magnetization curve of  $\text{Fe}_3\text{O}_4@m\text{SiO}_2(\text{MB})\text{-FA}$

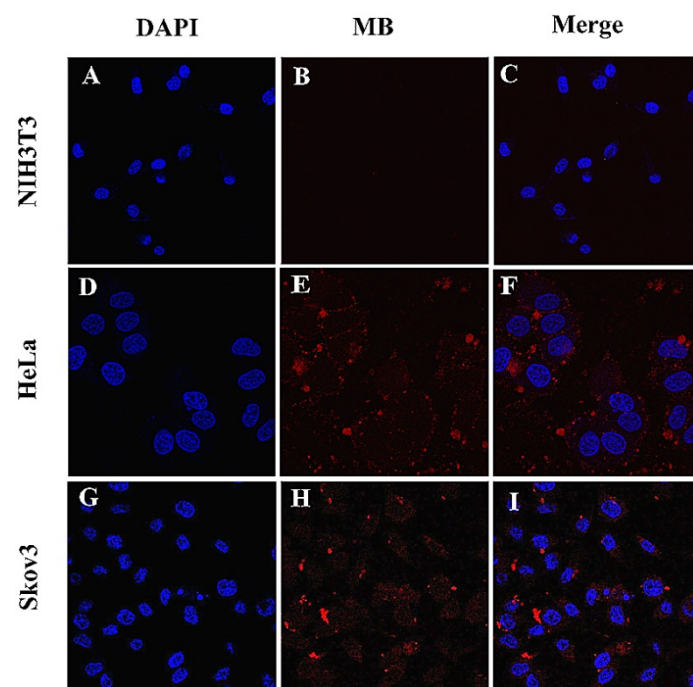

Fig. S6 Confocal laser micrographs of NIH 3T3 (A, B, C ), HeLa (D, E, F) and SK-OV-3 (G, H, I) cells incubated with  $\text{Fe}_3\text{O}_4@m\text{SiO}_2(\text{MB})\text{-FA}$ .

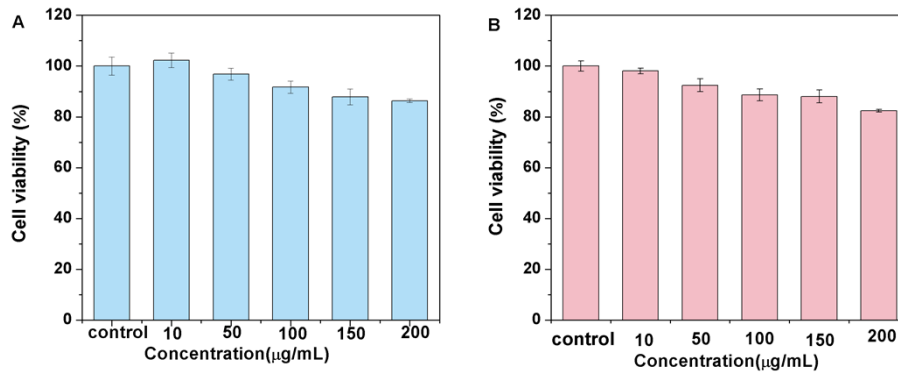

Fig. S7 *In vitro* cytotoxicity of  $\text{Fe}_3\text{O}_4@m\text{SiO}_2(\text{MB})\text{-FA}$  for different concentrations to SK-OV-3 cells at (A) 24 h and (B) 48 h.

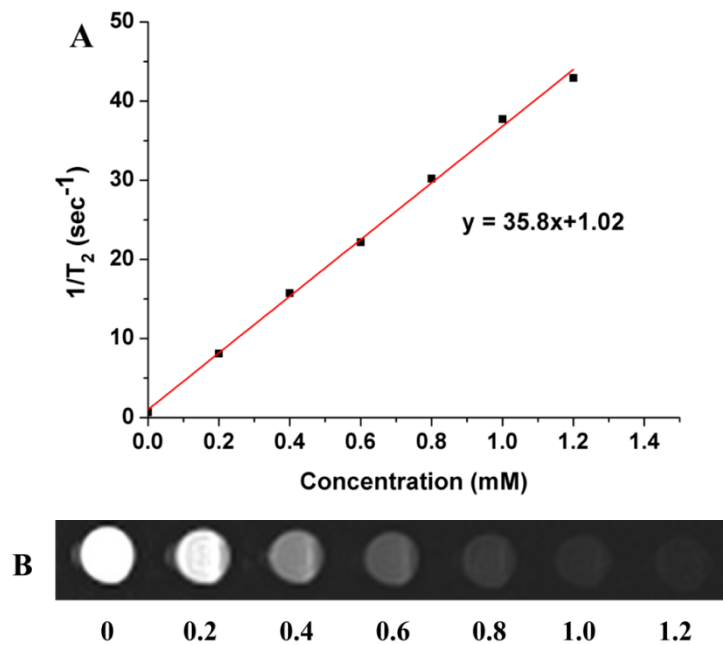

Fig. S8 (A) Relaxivity plot for  $\text{Fe}_3\text{O}_4@m\text{SiO}_2(\text{MB})\text{-FA}$  and (B) Phantom MR images of  $\text{Fe}_3\text{O}_4@m\text{SiO}_2(\text{MB})\text{-FA}$  showing  $T_2$  weighted bright contrast.
